# Supplementary material for: Dengue virus-like particles mimic the antigenic properties of the infectious dengue virus envelope
Source: Springer Nature journal article supplement (doi:10.1186/s12985-018-0970-2), 2018-04-02
Supplement: MOESM1 [file 15583072]

**Additional file 1.**

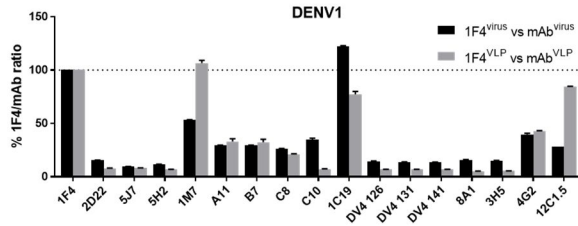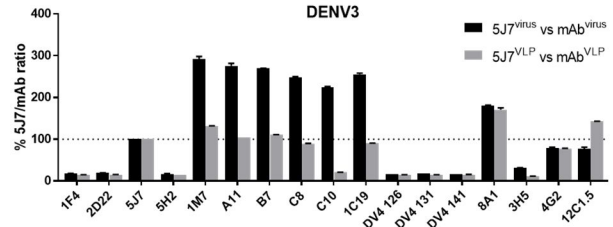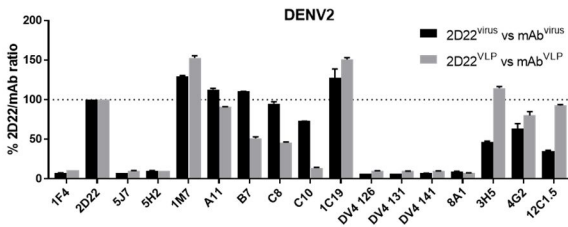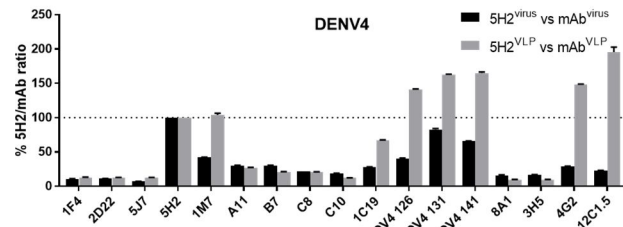

**Additional file 1. Normalized antibody binding to DENV virus particles and VLPs.** The binding of each mAb to virus (black bars) or VLPs (grey bars) within every DENV serotype was normalized to 1F4 (DENV1), 2D22 (DENV2), 5J7 (DENV3) and 5H2 (DENV4).
